# Supplementary material for: Connectivity stepwise derivation (CSD) method: a generic chemical structure information extraction method for the full step matrix
Source: Royal Society of Chemistry journal article supplement (doi:10.1039/d4dd00125g), 2024-01-01
Supplement: d4dd00125g1.pdf [file d4dd00125g1.pdf]

## Supplementary Information for

# **Connectivity Stepwise Derivation (CSD) method: A Generic Chemical Structure Information Extraction Method for the Full Step Matrix**

Jialiang Xiong<sup>1</sup>, Xiaojie Feng<sup>1</sup>, Jingxuan Xue<sup>2</sup>, Yueji Wang<sup>2</sup>, Haoren Niu<sup>1</sup>, Yu Gu<sup>2</sup>, Qingzhu

Jia<sup>2</sup>, Qiang Wang<sup>1</sup>, Fangyou Yan<sup>1\*</sup>

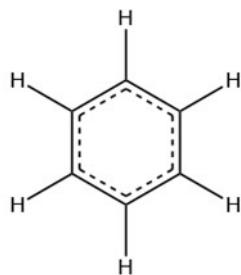

Benzene

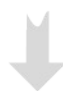

$L_c$ : [[2, 6, 7], [1, 3, 8], [2, 4, 9], [3, 5, 10], [4, 6, 11],  
[1, 5, 12], [1], [2], [3], [4], [5], [6]]

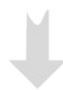

```
0 0 0 0 0 0 0 0 0 0 0 0
0 0 0 0 0 0 0 0 0 0 0 0
0 0 0 0 0 0 0 0 0 0 0 0
0 0 0 0 0 0 0 0 0 0 0 0
0 0 0 0 0 0 0 0 0 0 0 0
0 0 0 0 0 0 0 0 0 0 0 0
0 0 0 0 0 0 0 0 0 0 0 0
0 0 0 0 0 0 0 0 0 0 0 0
0 0 0 0 0 0 0 0 0 0 0 0
0 0 0 0 0 0 0 0 0 0 0 0
0 0 0 0 0 0 0 0 0 0 0 0
0 0 0 0 0 0 0 0 0 0 0 0
0 0 0 0 0 0 0 0 0 0 0 0
```

All-zero matrix

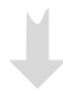

```
0 1 0 0 0 1 1 0 0 0 0 0
1 0 1 0 0 0 0 1 0 0 0 0
0 1 0 1 0 0 0 0 1 0 0 0
0 0 1 0 1 0 0 0 0 1 0 0
0 0 0 1 0 1 0 0 0 0 1 0
1 0 0 0 1 0 0 0 0 0 0 1
1 0 0 0 0 0 0 0 0 0 0 0
0 1 0 0 0 0 0 0 0 0 0 0
0 0 1 0 0 0 0 0 0 0 0 0
0 0 0 1 0 0 0 0 0 0 0 0
0 0 0 0 1 0 0 0 0 0 0 0
0 0 0 0 0 1 0 0 0 0 0 0
```

Adjacency matrix

**Figure S1.** Complete process of extracting atomic connectivity relationships from benzene molecules containing hydrogen (H) atoms and storing it in list form (i.e.,  $L_c$ ) which in turn generates the adjacency matrix.

|   |   |   |   |   |   |   |   |   |   |   |   |
|---|---|---|---|---|---|---|---|---|---|---|---|
| 0 | 1 | 0 | 0 | 0 | 1 | 1 | 0 | 0 | 0 | 0 | 0 |
| 1 | 0 | 1 | 0 | 0 | 0 | 0 | 1 | 0 | 0 | 0 | 0 |
| 0 | 1 | 0 | 1 | 0 | 0 | 0 | 0 | 1 | 0 | 0 | 0 |
| 0 | 0 | 1 | 0 | 1 | 0 | 0 | 0 | 0 | 1 | 0 | 0 |
| 0 | 0 | 0 | 1 | 0 | 1 | 0 | 0 | 0 | 0 | 1 | 0 |
| 1 | 0 | 0 | 0 | 1 | 0 | 0 | 0 | 0 | 0 | 0 | 1 |
| 1 | 0 | 0 | 0 | 0 | 0 | 0 | 0 | 0 | 0 | 0 | 0 |
| 0 | 1 | 0 | 0 | 0 | 0 | 0 | 0 | 0 | 0 | 0 | 0 |
| 0 | 0 | 1 | 0 | 0 | 0 | 0 | 0 | 0 | 0 | 0 | 0 |
| 0 | 0 | 0 | 1 | 0 | 0 | 0 | 0 | 0 | 0 | 0 | 0 |
| 0 | 0 | 0 | 0 | 1 | 0 | 0 | 0 | 0 | 0 | 0 | 0 |
| 0 | 0 | 0 | 0 | 0 | 1 | 0 | 0 | 0 | 0 | 0 | 0 |

Adjacency matrix

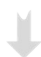

|   |   |   |   |   |   |   |   |   |   |   |   |
|---|---|---|---|---|---|---|---|---|---|---|---|
| 0 | 1 | 2 | 3 | 2 | 1 | 1 | 2 | 3 | 4 | 3 | 2 |
| 1 | 0 | 1 | 2 | 3 | 2 | 2 | 1 | 2 | 3 | 4 | 3 |
| 2 | 1 | 0 | 1 | 2 | 3 | 3 | 2 | 1 | 2 | 3 | 4 |
| 3 | 2 | 1 | 0 | 1 | 2 | 4 | 3 | 2 | 1 | 2 | 3 |
| 2 | 3 | 2 | 1 | 0 | 1 | 3 | 4 | 3 | 2 | 1 | 2 |
| 1 | 2 | 3 | 2 | 1 | 0 | 2 | 3 | 4 | 3 | 2 | 1 |
| 1 | 2 | 3 | 4 | 3 | 2 | 0 | 3 | 4 | 5 | 4 | 3 |
| 2 | 1 | 2 | 3 | 4 | 3 | 3 | 0 | 3 | 4 | 5 | 4 |
| 3 | 2 | 1 | 2 | 3 | 4 | 4 | 3 | 0 | 3 | 4 | 5 |
| 4 | 3 | 2 | 1 | 2 | 3 | 5 | 4 | 3 | 0 | 3 | 4 |
| 3 | 4 | 3 | 2 | 1 | 2 | 4 | 5 | 4 | 3 | 0 | 3 |
| 2 | 3 | 4 | 3 | 2 | 1 | 3 | 4 | 5 | 4 | 3 | 0 |

Full step matrix( $MS_F$ )

**Figure S2.** The process of generating the full connectivity matrix ( $MS_F$ ) from the adjacency matrix is exemplified by benzene molecules containing hydrogen (H) atoms.

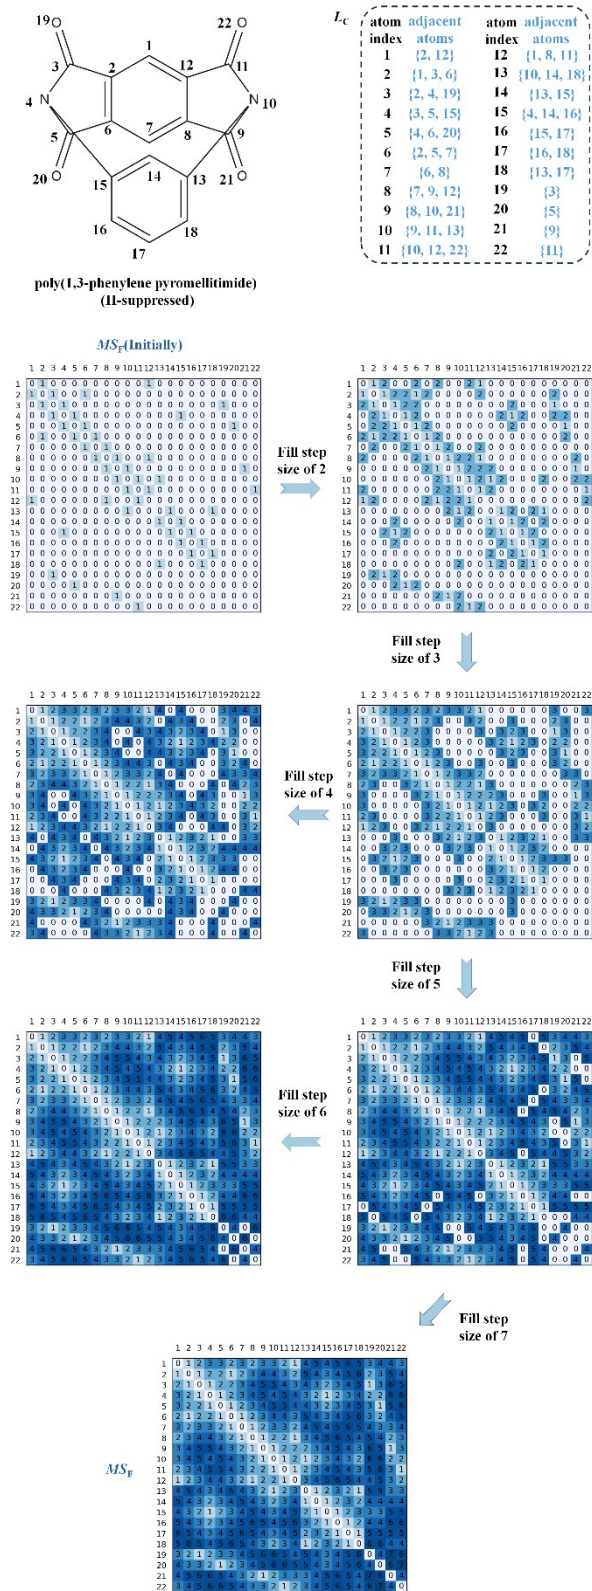

**Figure S3.** Illustration of the full step matrix ( $MS_F$ ) generation from the H-suppressed poly (1,3-phenylene pyromellitimide) molecule.

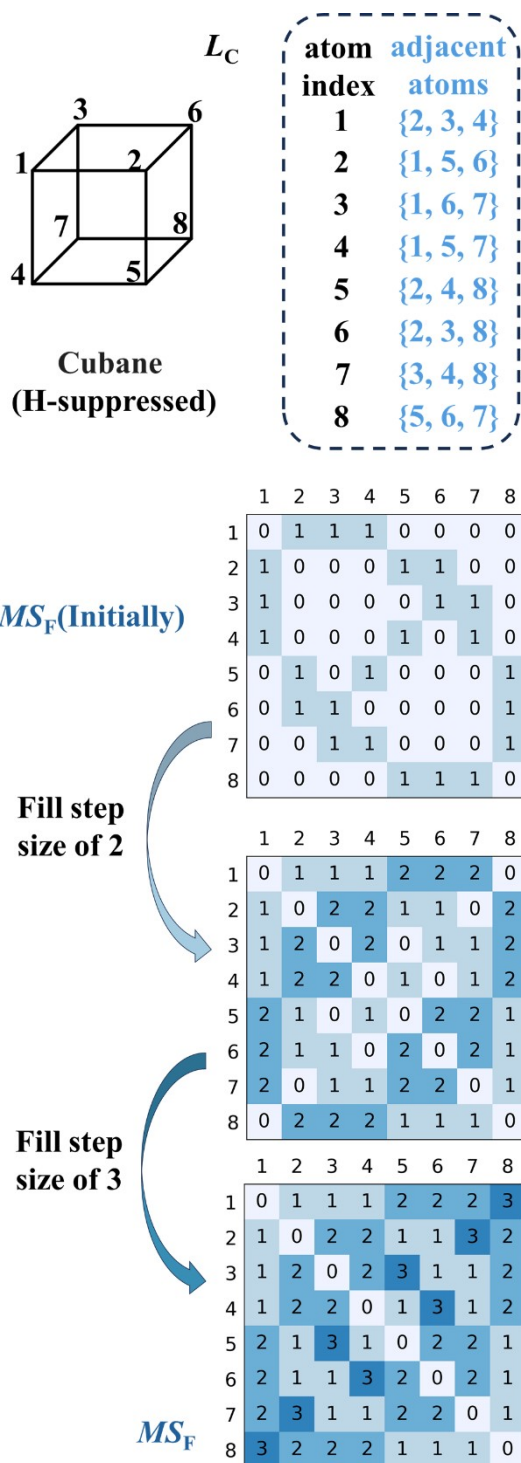

**Figure S4.** Illustration of the full step matrix ( $MS_F$ ) generation from the H-suppressed cubane molecule. Note: The process of generating  $MS_F$  of the three-dimensional structural is demonstrated using cubane as an example.
